# Supplementary material for: Suppressing self-discharge of Li–B/CoS2 thermal batteries by using a carbon-coated CoS2 cathode
Source: Royal Society of Chemistry journal article supplement (doi:10.1039/c7ra13071f), 2018-01-01

## checkCIF/PLATON report

You have not supplied any structure factors. As a result the full set of tests cannot be run.

THIS REPORT IS FOR GUIDANCE ONLY. IF USED AS PART OF A REVIEW PROCEDURE FOR PUBLICATION, IT SHOULD NOT REPLACE THE EXPERTISE OF AN EXPERIENCED CRYSTALLOGRAPHIC REFEREE.

No syntax errors found.      CIF dictionary      Interpreting this report

### Datablock: I

---

Bond precision:    Co- S = 0.0001 A                      Wavelength=0.71073

Cell:                      a=5.5385(2)              b=5.5385(2)              c=5.5385(2)  
                                         alpha=90              beta=90              gamma=90  
Temperature:              0 K

|                        | Calculated  | Reported |
|------------------------|-------------|----------|
| Volume                 | 169.893(18) | 170      |
| Space group            | P a -3      | P a -3   |
| Hall group             | -P 2ac 2ab  | ?        |
| Moiety formula         | Co S2       | ?        |
| Sum formula            | Co S2       | Co1 S2   |
| Mr                     | 123.05      | 0.00     |
| Dx,g cm <sup>-3</sup>  | 4.811       | 0.000    |
| Z                      | 4           | 4        |
| Mu (mm <sup>-1</sup> ) | 11.946      | 0.000    |
| F000                   | 236.0       | 0.0      |
| F000'                  | 238.40      |          |
| h,k,lmax               |             |          |
| Nref                   |             |          |
| Tmin,Tmax              |             |          |
| Tmin'                  |             |          |

Correction method= Not given

Data completeness=                      Theta(max)=

R(reflections)=                      wR2(reflections)=

S =                      Npar=

---

The following ALERTS were generated. Each ALERT has the format  
**test-name\_ALERT\_alert-type\_alert-level.**  
Click on the hyperlinks for more details of the test.

---

## Alert level A

CHEM003\_ALERT\_1\_A \_chemical\_formula\_weight is missing  
Chemical formula mass (Da).  
The following tests will not be performed.  
CHEMW\_01,CHEMW\_02,CHEMW\_03,DENSD\_01

SYMM001\_ALERT\_1\_A \_symmetry\_cell\_setting is missing  
The cell setting should be one of the following  
\* triclinic  
\* monoclinic  
\* orthorhombic  
\* tetragonal  
\* rhombohedral  
\* trigonal  
\* hexagonal  
\* cubic  
The following tests will not be performed.  
SYMMS\_01,SYMMS\_02

EXPT001\_ALERT\_1\_A \_exptl\_crystal\_density\_diffn is missing  
Density calculated from unit cell and contents (Mg m<sup>-3</sup>).  
The following tests will not be performed.  
DENSD\_01,DENSX\_01

DIFF001\_ALERT\_1\_A \_diffrn\_radiation\_type is missing  
The radiation type should contain one of the following  
\* 'Cu K\alpha'  
\* 'Mo K\alpha'  
\* 'Ag K\alpha'  
\* neutron  
\* synchrotron  
The following tests will not be performed.  
ABSMU\_01,ABSTM\_02,CRYSS\_01,RADNW\_01

DIFF002\_ALERT\_1\_A \_diffrn\_radiation\_wavelength is missing  
Radiation wavelength (Å).  
The following tests will not be performed.  
RADNW\_01,REFLT\_03,REFNR\_01,THETM\_01

CELL003\_ALERT\_1\_A \_cell\_measurement\_reflms\_used is missing  
Number of reflections used to measure unit cell.

CELL004\_ALERT\_1\_A \_cell\_measurement\_theta\_min is missing  
Minimum theta of reflections used to measure unit cell.  
The following tests will not be performed.  
CELLT\_01

CELL005\_ALERT\_1\_A \_cell\_measurement\_theta\_max is missing  
Maximum theta of reflections used to measure unit cell.  
The following tests will not be performed.  
CELLT\_01

CELL006\_ALERT\_1\_A \_cell\_measurement\_temperature is missing  
Measurement temperature (K).  
The following tests will not be performed.  
CELLK\_01

EXPT004\_ALERT\_1\_A \_exptl\_absorpt\_coefficient\_mu is missing  
Linear absorption coefficient (mm<sup>-1</sup>).  
The following tests will not be performed.  
ABSMU\_01,ABSTM\_02

EXPT005\_ALERT\_1\_A \_exptl\_crystal\_description is missing  
Crystal habit description.  
The following tests will not be performed.  
CRYSR\_01

EXPT009\_ALERT\_1\_A No crystal dimensions have been given.  
The following tests will not be performed.  
CRYSS\_01,CRYSS\_02

EXPT108\_ALERT\_1\_A The magnitudes of the crystal dimensions do not  
match the min, mid and max definitions

EXPT010\_ALERT\_1\_A \_exptl\_crystal\_colour (\_pd\_char\_colour for powder) is missing  
Crystal colour.  
The following tests will not be performed.  
CRYSC\_01

DIFF003\_ALERT\_1\_A \_diffrn\_measurement\_device\_type is missing  
Diffractometer make and type. Replaces \_diffrn\_measurement\_type.

DIFF005\_ALERT\_1\_A \_diffrn\_measurement\_method is missing  
Mode of intensity measurement and scan.

DIFF007\_ALERT\_1\_A \_diffrn\_reflms\_number is missing  
Total number of reflections measured.  
The following tests will not be performed.  
REFLG\_01,REFLT\_01

REFL001\_ALERT\_1\_A \_reflms\_number\_total is missing  
Number of symmetry-independent reflections.  
The following tests will not be performed.  
REFLT\_01,REFLT\_02,REFLT\_03,REFNR\_01

REFL002\_ALERT\_1\_A \_reflms\_number\_gt is missing  
Number of reflections > sigma threshold.  
The following tests will not be performed.  
REFLG\_01,REFLT\_02

REFL004\_ALERT\_1\_A \_reflms\_threshold\_expression is missing  
Sigma expression for F, F2 or I threshold.  
The following tests will not be performed.  
REFLE\_01

DIFF008\_ALERT\_1\_A \_diffrn\_reflms\_theta\_max is missing  
Maximum theta of measured reflections.  
The following tests will not be performed  
REFLT\_03,REFNR\_01,THETM\_01

DIFF013\_ALERT\_1\_A \_diffrn\_reflms\_limit\_h\_min is missing  
Minimum h index of measured data.  
The following tests will not be performed  
REFLL\_01

DIFF014\_ALERT\_1\_A \_diffrn\_reflms\_limit\_h\_max is missing  
Maximum h index of measured data.  
The following tests will not be performed  
REFLL\_01

DIFF015\_ALERT\_1\_A \_diffrn\_reflms\_limit\_k\_min is missing  
Minimum k index of measured data.  
The following tests will not be performed  
REFLL\_01

DIFF016\_ALERT\_1\_A \_diffrn\_reflms\_limit\_k\_max is missing  
Maximum k index of measured data.  
The following tests will not be performed  
REFLL\_01

DIFF017\_ALERT\_1\_A \_diffrn\_reflms\_limit\_l\_min is missing  
Minimum l index of measured data.  
The following tests will not be performed  
REFLL\_01

DIFF018\_ALERT\_1\_A \_diffrn\_reflms\_limit\_l\_max is missing  
Maximum l index of measured data.  
The following tests will not be performed  
REFLL\_01

DIFF019\_ALERT\_1\_A \_diffrn\_standards\_number is missing  
Number of standards used in measurement.

DIFF020\_ALERT\_1\_A \_diffrn\_standards\_interval\_count and  
\_diffrn\_standards\_interval\_time are missing. Number of measurements  
between standards or time (min) between standards.

DIFF022\_ALERT\_1\_A \_diffrn\_standards\_decay\_% is missing  
Percentage decrease in standards intensity.

REFI001\_ALERT\_1\_A \_refine\_ls\_structure\_factor\_coef is missing  
The structure factor coefficient should be one of the following  
\* Inet

```

* Fsqd
* F
The following tests will not be performed
FCOEF_01
REFI003_ALERT_1_A _refine_ls_R_factor_gt is missing
R factor of F for reflections > threshold.
The following tests will not be performed
RFACG_01
REFI005_ALERT_1_A _refine_ls_wR_factor_ref is missing
R factor of coefficient for refinement reflections.
The following tests will not be performed
RFACR_01
REFI007_ALERT_1_A _refine_ls_goodness_of_fit_ref is missing
Goodness of fit S for refinement reflections.
The following tests will not be performed
GOODF_01
REFI009_ALERT_1_A _refine_ls_number_reflns is missing
Number of reflections used in refinement.
The following test will not be performed
REFNR_01
REFI010_ALERT_1_A _refine_ls_number_parameters is missing
Number of parameters refined.
The following tests will not be performed
REFNR_01
REFI011_ALERT_1_A _refine_ls_weighting_scheme is missing
The weighting scheme should be one of the following
* sigma
* calc
The following tests will not be performed
WEIGH_01
REFI015_ALERT_1_A _refine_ls_shift/su_max is missing
Maximum shift/s.u. ratio after final refinement cycle.
The following tests will not be performed
SHFSU_01
REFI017_ALERT_1_A _refine_diff_density_max is missing
Maximum value of final difference map (e A-3).
The following tests will not be performed
DIFMN_01,DIFMX_01,DIFMX_02
REFI018_ALERT_1_A _refine_diff_density_min is missing
Minimum value of final difference map (e A-3).
The following tests will not be performed
DIFMN_01,DIFMN_02,DIFMN_03
SYMM005_ALERT_1_A _symmetry_equiv_pos_as_xyz contains invalid data.
n.b. Symops such as 'x+0.5,y+0.5,z' are not allowed.
They should be 'x+1/2,y+1/2,z'.
The following tests will not be performed.
CELLZ_01,CHEMW_03,REFLT_03,SYMMG_01,SYMMG_02
SYMM005_ALERT_1_A _symmetry_equiv_pos_as_xyz contains invalid data.
n.b. Symops such as 'x+0.5,y+0.5,z' are not allowed.
They should be 'x+1/2,y+1/2,z'.
The following tests will not be performed.
CELLZ_01,CHEMW_03,REFLT_03,SYMMG_01,SYMMG_02
SYMM005_ALERT_1_A _symmetry_equiv_pos_as_xyz contains invalid data.
n.b. Symops such as 'x+0.5,y+0.5,z' are not allowed.
They should be 'x+1/2,y+1/2,z'.
The following tests will not be performed.
CELLZ_01,CHEMW_03,REFLT_03,SYMMG_01,SYMMG_02
SYMM005_ALERT_1_A _symmetry_equiv_pos_as_xyz contains invalid data.
n.b. Symops such as 'x+0.5,y+0.5,z' are not allowed.
They should be 'x+1/2,y+1/2,z'.
The following tests will not be performed.
CELLZ_01,CHEMW_03,REFLT_03,SYMMG_01,SYMMG_02

```



They should be 'x+1/2,y+1/2,z'.  
The following tests will not be performed.  
CELLZ\_01,CHEMW\_03,REFLT\_03,SYMMG\_01,SYMMG\_02  
SYMM005\_ALERT\_1\_A \_symmetry\_equiv\_pos\_as\_xyz contains invalid data.  
n.b. Symops such as 'x+0.5,y+0.5,z' are not allowed.  
They should be 'x+1/2,y+1/2,z'.  
The following tests will not be performed.  
CELLZ\_01,CHEMW\_03,REFLT\_03,SYMMG\_01,SYMMG\_02  
ATOM006\_ALERT\_1\_A \_atom\_site\_U\_iso\_or\_equiv is missing  
Isotropic atomic displacement paramter, or equivalent from  
anisotropic atomic displacement parameters.  
GEOM001\_ALERT\_1\_A \_geom\_bond\_atom\_site\_label\_1 is missing  
Label identifying the atom site 1.  
GEOM003\_ALERT\_1\_A \_geom\_bond\_distance is missing  
Distance between atom sites 1 and 2.  
GEOM005\_ALERT\_1\_A \_geom\_angle\_atom\_site\_label\_1 is missing  
Label identifying the atom site 1.  
GEOM006\_ALERT\_1\_A \_geom\_angle\_atom\_site\_label\_2 is missing  
Label identifying the atom site 2.  
GEOM007\_ALERT\_1\_A \_geom\_angle\_atom\_site\_label\_3 is missing  
Label identifying the atom site 3.  
ABSTY01\_ALERT\_1\_A The absorption correction should be one of the following  
\* none  
\* analytical  
\* integration  
\* numerical  
\* gaussian  
\* empirical  
\* psi-scan  
\* multi-scan  
\* refdelf  
\* sphere  
\* cylinder  
PLAT029\_ALERT\_3\_A \_diffrn\_measured\_fraction\_theta\_full value Low . 0.000 Why?  
PLAT043\_ALERT\_1\_A Calculated and Reported Mol. Weight Differ by .. 123.05 Check  
PLAT044\_ALERT\_1\_A Calculated and Reported Density Dx Differ by .. 4.8108 Check  
PLAT050\_ALERT\_1\_A Absorption Coefficient mu Not Given ..... Please Do !  
PLAT086\_ALERT\_2\_A Unsatisfactory S Value (Too Low or Not Given) .. 0.00 Check  
PLAT091\_ALERT\_1\_A No Wavelength Found in CIF - 0.71073 Ang Assumed Please Check  
PLAT183\_ALERT\_1\_A Missing \_cell\_measurement\_reflns\_used Value .... Please Do !  
PLAT184\_ALERT\_1\_A Missing \_cell\_measurement\_theta\_min Value ..... Please Do !  
PLAT185\_ALERT\_1\_A Missing \_cell\_measurement\_theta\_max Value ..... Please Do !  
PLAT197\_ALERT\_1\_A Missing \_cell\_measurement\_temperature Datum .... Please Add  
PLAT198\_ALERT\_1\_A Missing \_diffrn\_ambient\_temperature Datum .... Please Add  
PLAT880\_ALERT\_1\_A N0 datum for \_diffrn\_reflns\_number ..... Please Do !  
PLAT881\_ALERT\_1\_A No Datum for \_diffrn\_reflns\_av\_R\_equivalents ... Please Do !

---

 **Alert level B**

PLAT025\_ALERT\_1\_B Hmin..Lmax Data Incomplete or Missing ..... Please Check

---

 **Alert level C**

ABSTY02\_ALERT\_1\_C An \_exptl\_absorpt\_correction\_type has been given without  
a literature citation. This should be contained in the  
\_exptl\_absorpt\_process\_details field.  
Absorption correction given as Not Given  
PLAT125\_ALERT\_4\_C No '\_symmetry\_space\_group\_name\_Hall' Given ..... Please Do !  
PLAT151\_ALERT\_1\_C No s.u. (esd) Given on Volume ..... Please Do !

---

## ● Alert level G

|                   |                                                  |              |       |
|-------------------|--------------------------------------------------|--------------|-------|
| PLAT004_ALERT_5_G | Polymeric Structure Found with Maximum Dimension | 3            | Info  |
| PLAT005_ALERT_5_G | No Embedded Refinement Details Found in the CIF  | Please Do !  |       |
| PLAT104_ALERT_1_G | The Reported Crystal System is Inconsistent with | Pa-3         | Check |
| PLAT432_ALERT_2_G | Short Inter X...Y Contact S1 ..S1                | 3.40         | Ang.  |
| PLAT432_ALERT_2_G | Short Inter X...Y Contact S1 ..S1                | 3.40         | Ang.  |
| PLAT432_ALERT_2_G | Short Inter X...Y Contact S1 ..S1                | 3.40         | Ang.  |
| PLAT432_ALERT_2_G | Short Inter X...Y Contact S1 ..S1                | 3.40         | Ang.  |
| PLAT432_ALERT_2_G | Short Inter X...Y Contact S1 ..S1                | 3.40         | Ang.  |
| PLAT432_ALERT_2_G | Short Inter X...Y Contact S1 ..S1                | 3.40         | Ang.  |
| PLAT794_ALERT_5_G | Tentative Bond Valency for Col (II)              | 2.12         | Info  |
| PLAT808_ALERT_5_G | No Parseable SHELXL Style Weighting Scheme Found | Please Check |       |
| PLAT882_ALERT_1_G | No Datum for _diffrn_reflms_av_unetI/netI .....  | Please Do !  |       |
| PLAT981_ALERT_1_G | No non-zero f" Anomalous Scattering Values Found | Please Check |       |
| PLAT986_ALERT_1_G | No non-zero f' Anomalous Scattering Values Found | Please Check |       |

---

78 **ALERT level A** = Most likely a serious problem - resolve or explain  
1 **ALERT level B** = A potentially serious problem, consider carefully  
3 **ALERT level C** = Check. Ensure it is not caused by an omission or oversight  
14 **ALERT level G** = General information/check it is not something unexpected

83 **ALERT type 1** CIF construction/syntax error, inconsistent or missing data  
7 **ALERT type 2** Indicator that the structure model may be wrong or deficient  
1 **ALERT type 3** Indicator that the structure quality may be low  
1 **ALERT type 4** Improvement, methodology, query or suggestion  
4 **ALERT type 5** Informative message, check

---

## checkCIF publication errors

### ● Alert level A

PUBL004\_ALERT\_1\_A The contact author's name and address are missing,  
\_publ\_contact\_author\_name and \_publ\_contact\_author\_address.  
PUBL005\_ALERT\_1\_A \_publ\_contact\_author\_email, \_publ\_contact\_author\_fax and  
\_publ\_contact\_author\_phone are all missing.  
At least one of these should be present.  
PUBL006\_ALERT\_1\_A \_publ\_requested\_journal is missing  
e.g. 'Acta Crystallographica Section C'  
PUBL010\_ALERT\_1\_A \_publ\_author\_address is missing. Author(s) address(es).  
PUBL012\_ALERT\_1\_A \_publ\_section\_abstract is missing.  
Abstract of paper in English.  
PUBL016\_ALERT\_1\_A Details of the refinement are missing.  
e.g. \_publ\_section\_exptl\_refinement  
\_computing\_data\_collection  
\_computing\_cell\_refinement , etc.  
ATOM001\_ALERT\_1\_A \_atom\_type\_scatter\_source is missing  
Reference to scattering factors applied.  
PUBL021\_ALERT\_1\_A There is more than one comma in the author field.  
Please check that the author/address loop has been  
completed according to the CIF specification.  
Author = Nowack, E. ;Schwarzenbach, D. ;Hahn, T.

---

### ● Alert level G

PUBL017\_ALERT\_1\_G The \_publ\_section\_references section is missing or empty.

---

8 **ALERT level A** = Data missing that is essential or data in wrong format  
1 **ALERT level G** = General alerts. Data that may be required is missing

---

## Publication of your CIF

You should attempt to resolve as many as possible of the alerts in all categories. Often the minor alerts point to easily fixed oversights, errors and omissions in your CIF or refinement strategy, so attention to these fine details can be worthwhile. In order to resolve some of the more serious problems it may be necessary to carry out additional measurements or structure refinements. However, the nature of your study may justify the reported deviations from journal submission requirements and the more serious of these should be commented upon in the discussion or experimental section of a paper or in the "special\_details" fields of the CIF. *checkCIF* was carefully designed to identify outliers and unusual parameters, but every test has its limitations and alerts that are not important in a particular case may appear. Conversely, the absence of alerts does not guarantee there are no aspects of the results needing attention. It is up to the individual to critically assess their own results and, if necessary, seek expert advice.

If level A alerts remain, which you believe to be justified deviations, and you intend to submit this CIF for publication in a journal, you should additionally insert an explanation in your CIF using the Validation Reply Form (VRF) below. This will allow your explanation to be considered as part of the review process.

## Validation response form

Please find below a validation response form (VRF) that can be filled in and pasted into your CIF.

```
# start Validation Reply Form
_vrf_PUBL004_GLOBAL
;
PROBLEM: The contact author's name and address are missing,
RESPONSE: ...
;
_vrf_PUBL005_GLOBAL
;
PROBLEM: _publ_contact_author_email, _publ_contact_author_fax and
RESPONSE: ...
;
_vrf_PUBL006_GLOBAL
;
PROBLEM: _publ_requested_journal is missing
RESPONSE: ...
;
_vrf_PUBL010_GLOBAL
;
PROBLEM: _publ_author_address is missing. Author(s) address(es).
RESPONSE: ...
;
_vrf_PUBL012_GLOBAL
;
PROBLEM: _publ_section_abstract is missing.
RESPONSE: ...
;
```



\_vrf\_PUBL016\_GLOBAL  
;  
PROBLEM: Details of the refinement are missing.  
RESPONSE: ...  
;  
\_vrf\_ATOM001\_GLOBAL  
;  
PROBLEM: \_atom\_type\_scatter\_source is missing  
RESPONSE: ...  
;  
\_vrf\_PUBL021\_GLOBAL  
;  
PROBLEM: There is more than one comma in the author field.  
RESPONSE: ...  
;  
\_vrf\_CHEM003\_I  
;  
PROBLEM: \_chemical\_formula\_weight is missing  
RESPONSE: ...  
;  
\_vrf\_SYMM001\_I  
;  
PROBLEM: \_symmetry\_cell\_setting is missing  
RESPONSE: ...  
;  
\_vrf\_EXPT001\_I  
;  
PROBLEM: \_exptl\_crystal\_density\_diffrn is missing  
RESPONSE: ...  
;  
\_vrf\_DIFF001\_I  
;  
PROBLEM: \_diffrn\_radiation\_type is missing  
RESPONSE: ...  
;  
\_vrf\_DIFF002\_I  
;  
PROBLEM: \_diffrn\_radiation\_wavelength is missing  
RESPONSE: ...  
;  
\_vrf\_CELL003\_I  
;  
PROBLEM: \_cell\_measurement\_reflns\_used is missing  
RESPONSE: ...  
;  
\_vrf\_CELL004\_I  
;  
PROBLEM: \_cell\_measurement\_theta\_min is missing  
RESPONSE: ...  
;  
\_vrf\_CELL005\_I  
;  
PROBLEM: \_cell\_measurement\_theta\_max is missing  
RESPONSE: ...  
;  
\_vrf\_CELL006\_I  
;  
PROBLEM: \_cell\_measurement\_temperature is missing  
RESPONSE: ...  
;  
\_vrf\_EXPT004\_I  
;

PROBLEM: \_exptl\_absorpt\_coefficient\_mu is missing  
RESPONSE: ...  
;  
\_vrf\_EXPT005\_I  
;  
PROBLEM: \_exptl\_crystal\_description is missing  
RESPONSE: ...  
;  
\_vrf\_EXPT009\_I  
;  
PROBLEM: No crystal dimensions have been given.  
RESPONSE: ...  
;  
\_vrf\_EXPT108\_I  
;  
PROBLEM: The magnitudes of the crystal dimensions do not  
RESPONSE: ...  
;  
\_vrf\_EXPT010\_I  
;  
PROBLEM: \_exptl\_crystal\_colour (\_pd\_char\_colour for powder) is missing  
RESPONSE: ...  
;  
\_vrf\_DIFF003\_I  
;  
PROBLEM: \_diffrn\_measurement\_device\_type is missing  
RESPONSE: ...  
;  
\_vrf\_DIFF005\_I  
;  
PROBLEM: \_diffrn\_measurement\_method is missing  
RESPONSE: ...  
;  
\_vrf\_DIFF007\_I  
;  
PROBLEM: \_diffrn\_reflns\_number is missing  
RESPONSE: ...  
;  
\_vrf\_REFL001\_I  
;  
PROBLEM: \_reflns\_number\_total is missing  
RESPONSE: ...  
;  
\_vrf\_REFL002\_I  
;  
PROBLEM: \_reflns\_number\_gt is missing  
RESPONSE: ...  
;  
\_vrf\_REFL004\_I  
;  
PROBLEM: \_reflns\_threshold\_expression is missing  
RESPONSE: ...  
;  
\_vrf\_DIFF008\_I  
;  
PROBLEM: \_diffrn\_reflns\_theta\_max is missing  
RESPONSE: ...  
;  
\_vrf\_DIFF013\_I  
;  
PROBLEM: \_diffrn\_reflns\_limit\_h\_min is missing  
RESPONSE: ...

```
;
_vrf_DIFF014_I
;
PROBLEM: _diffrn_reflms_limit_h_max is missing
RESPONSE: ...
;
_vrf_DIFF015_I
;
PROBLEM: _diffrn_reflms_limit_k_min is missing
RESPONSE: ...
;
_vrf_DIFF016_I
;
PROBLEM: _diffrn_reflms_limit_k_max is missing
RESPONSE: ...
;
_vrf_DIFF017_I
;
PROBLEM: _diffrn_reflms_limit_l_min is missing
RESPONSE: ...
;
_vrf_DIFF018_I
;
PROBLEM: _diffrn_reflms_limit_l_max is missing
RESPONSE: ...
;
_vrf_DIFF019_I
;
PROBLEM: _diffrn_standards_number is missing
RESPONSE: ...
;
_vrf_DIFF020_I
;
PROBLEM: _diffrn_standards_interval_count and
RESPONSE: ...
;
_vrf_DIFF022_I
;
PROBLEM: _diffrn_standards_decay_% is missing
RESPONSE: ...
;
_vrf_REFI001_I
;
PROBLEM: _refine_ls_structure_factor_coef is missing
RESPONSE: ...
;
_vrf_REFI003_I
;
PROBLEM: _refine_ls_R_factor_gt is missing
RESPONSE: ...
;
_vrf_REFI005_I
;
PROBLEM: _refine_ls_wR_factor_ref is missing
RESPONSE: ...
;
_vrf_REFI007_I
;
PROBLEM: _refine_ls_goodness_of_fit_ref is missing
RESPONSE: ...
;
_vrf_REFI009_I
```

```
;
PROBLEM: _refine_ls_number_reflns is missing
RESPONSE: ...
;
_vrf_REFI010_I
;
PROBLEM: _refine_ls_number_parameters is missing
RESPONSE: ...
;
_vrf_REFI011_I
;
PROBLEM: _refine_ls_weighting_scheme is missing
RESPONSE: ...
;
_vrf_REFI015_I
;
PROBLEM: _refine_ls_shift/su_max is missing
RESPONSE: ...
;
_vrf_REFI017_I
;
PROBLEM: _refine_diff_density_max is missing
RESPONSE: ...
;
_vrf_REFI018_I
;
PROBLEM: _refine_diff_density_min is missing
RESPONSE: ...
;
_vrf_SYMM005_I
;
PROBLEM: _symmetry_equiv_pos_as_xyz contains invalid data.
RESPONSE: ...
;
_vrf_ATOM006_I
;
PROBLEM: _atom_site_U_iso_or_equiv is missing
RESPONSE: ...
;
_vrf_GEOM001_I
;
PROBLEM: _geom_bond_atom_site_label_1 is missing
RESPONSE: ...
;
_vrf_GEOM003_I
;
PROBLEM: _geom_bond_distance is missing
RESPONSE: ...
;
_vrf_GEOM005_I
;
PROBLEM: _geom_angle_atom_site_label_1 is missing
RESPONSE: ...
;
_vrf_GEOM006_I
;
PROBLEM: _geom_angle_atom_site_label_2 is missing
RESPONSE: ...
;
_vrf_GEOM007_I
;
PROBLEM: _geom_angle_atom_site_label_3 is missing
```

```

RESPONSE: ...
;
_vrf_ABSTY01_I
;
PROBLEM: The absorption correction should be one of the following
RESPONSE: ...
;
_vrf_PLAT029_I
;
PROBLEM: _diffn_measured_fraction_theta_full value Low .      0.000 Why?
RESPONSE: ...
;
_vrf_PLAT043_I
;
PROBLEM: Calculated and Reported Mol. Weight Differ by ..    123.05 Check
RESPONSE: ...
;
_vrf_PLAT044_I
;
PROBLEM: Calculated and Reported Density Dx Differ by ..     4.8108 Check
RESPONSE: ...
;
_vrf_PLAT050_I
;
PROBLEM: Absorption Coefficient mu Not Given .....           Please Do !
RESPONSE: ...
;
_vrf_PLAT086_I
;
PROBLEM: Unsatisfactory S Value (Too Low or Not Given) ..    0.00 Check
RESPONSE: ...
;
_vrf_PLAT091_I
;
PROBLEM: No Wavelength Found in CIF - 0.71073 Ang Assumed    Please Check
RESPONSE: ...
;
_vrf_PLAT183_I
;
PROBLEM: Missing _cell_measurement_reflms_used Value ....    Please Do !
RESPONSE: ...
;
_vrf_PLAT184_I
;
PROBLEM: Missing _cell_measurement_theta_min Value .....     Please Do !
RESPONSE: ...
;
_vrf_PLAT185_I
;
PROBLEM: Missing _cell_measurement_theta_max Value .....     Please Do !
RESPONSE: ...
;
_vrf_PLAT197_I
;
PROBLEM: Missing _cell_measurement_temperature Datum ....    Please Add
RESPONSE: ...
;
_vrf_PLAT198_I
;
PROBLEM: Missing _diffn_ambient_temperature Datum ....       Please Add
RESPONSE: ...
;

```

```

_vrf_PLAT880_I
;
PROBLEM: NO datum for _diffrn_reflms_number ..... Please Do !
RESPONSE: ...
;
_vrf_PLAT881_I
;
PROBLEM: No Datum for _diffrn_reflms_av_R_equivalents ... Please Do !
RESPONSE: ...
;
# end Validation Reply Form

```

If you wish to submit your CIF for publication in Acta Crystallographica Section C or E, you should upload your CIF via the web. If you wish to submit your CIF for publication in IUCrData you should upload your CIF via the web. If your CIF is to form part of a submission to another IUCr journal, you will be asked, either during electronic submission or by the Co-editor handling your paper, to upload your CIF via our web site.

**PLATON version of 09/11/2017; check.def file version of 08/11/2017**

Datablock I - ellipsoid plot

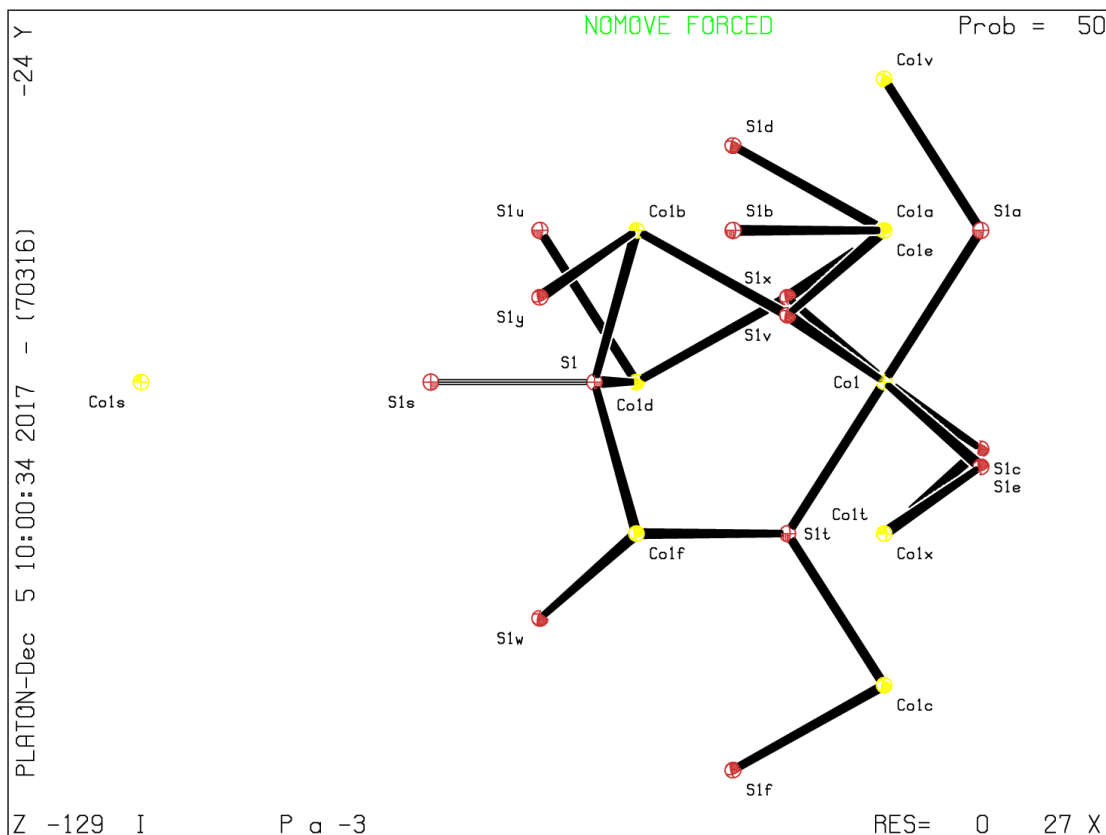

Supplement: c7ra13071f3.pdf [file c7ra13071f3.pdf]
